# Supplementary material for: Revealing the synergistic effect of LiF and Li3N in solid electrolyte interphases for stable lithium metal batteries using in situ electrochemical atomic force microscopy
Source: Royal Society of Chemistry journal article supplement (doi:10.1039/d3ta08019f), 2024-01-01
Supplement: d3ta08019f1.pdf [file d3ta08019f1.pdf]

**Revealing the Synergistic Effect of LiF and Li<sub>3</sub>N in Solid Electrolyte Interphase for Stable Lithium Metal batteries via In-Situ Electrochemical Atomic Force Microscope**

Shuwei Wang<sup>a</sup>, Jianxun Zhang<sup>a</sup>, Lihan Zhang<sup>b\*</sup>, Xiaojing Li<sup>c</sup>, Rui Zhao<sup>c</sup>, Yuanming Liu<sup>c</sup>, Zile Wang<sup>a</sup>, Xuewei Lu<sup>a</sup>, Yan Xin<sup>a</sup>, Huajun Tian<sup>a\*</sup>, Feiyu Kang<sup>c</sup>, Baohua Li<sup>c\*</sup>

<sup>a</sup> Key Laboratory of Power Station Energy Transfer Conversion and Systems  
Ministry of Education, North China Electric Power University, Beijing 102206, China

<sup>b</sup> Beijing Key Laboratory of Microstructure and Properties of Solids Institute of  
Microstructure and Properties of Advanced Materials, Beijing University of  
Technology, Beijing 100124, China

<sup>c</sup> Shenzhen Key Laboratory on Power Battery Safety Research and Shenzhen Geim  
Graphene Center, Tsinghua Shenzhen International Graduate School, Shenzhen  
518055, China

Corresponding Authors:

E-mail: zhanglh06@bjut.edu.cn

E-mail: Huajun.Tian@ncepu.edu.cn

E-mail: libh@sz.tsinghua.edu.cn

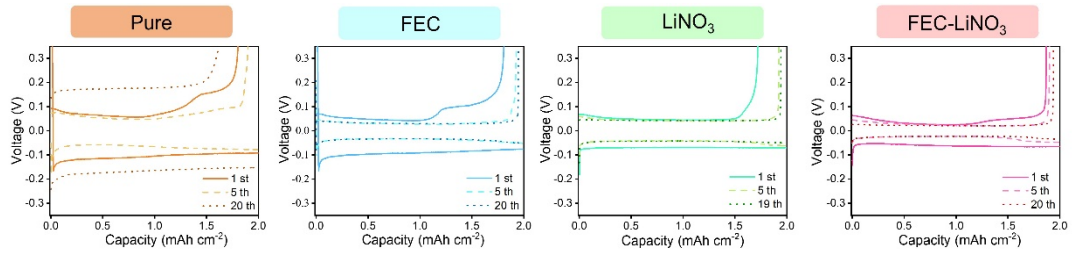

Figure S1. Voltage capacity profiles of different cycles for plating capacities of  $2.0 \text{ mAh cm}^{-2}$  in different electrolytes.

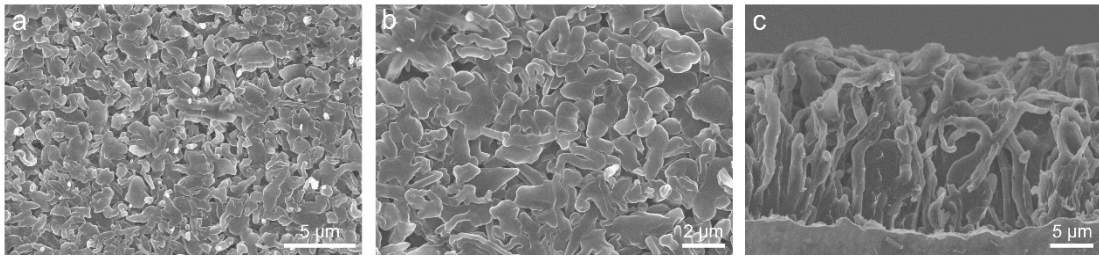

Figure S2. Top view (a-b) and cross view (b) SEM images of Li metal deposited at  $1.0 \text{ mA cm}^{-2}$  for 2 h ( $2.0 \text{ mAh cm}^{-2}$ ) after plating in pure electrolyte.

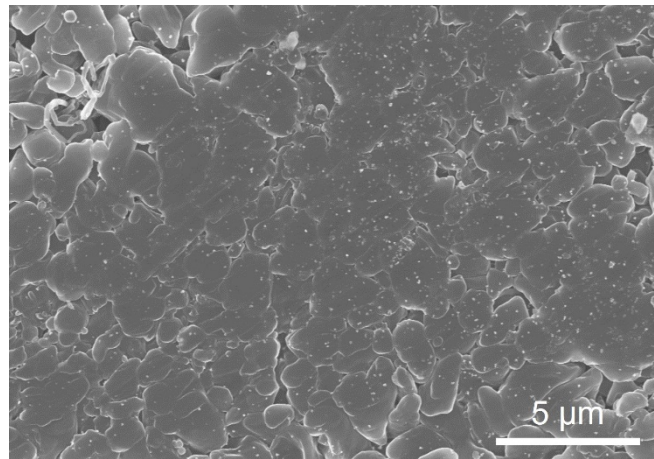

Figure S3. SEM images of Li metal deposited at  $1.0 \text{ mA cm}^{-2}$  for 2 h ( $2.0 \text{ mAh cm}^{-2}$ ) after plating in FEC electrolyte with low magnifications.

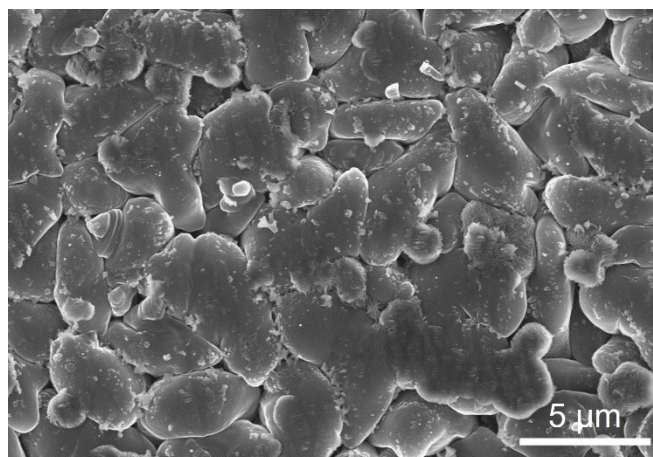

Figure S4. SEM images of Li metal deposited at  $1.0 \text{ mA cm}^{-2}$  for 2 h ( $2.0 \text{ mAh cm}^{-2}$ ) after plating in  $\text{LiNO}_3$  electrolyte with low magnifications.

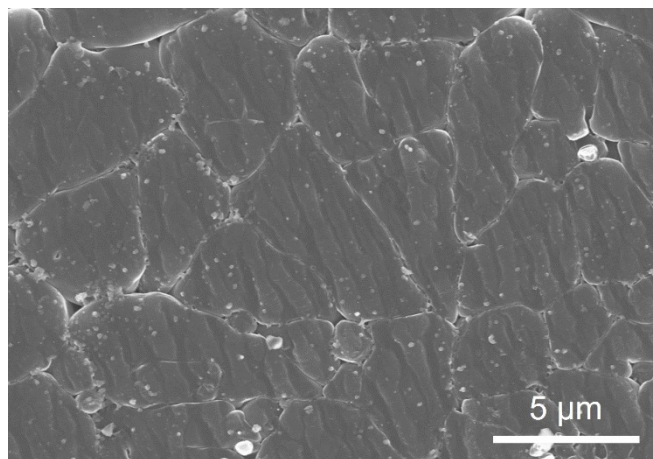

Figure S5. SEM images of Li metal deposited at  $1.0 \text{ mA cm}^{-2}$  for 2 h ( $2.0 \text{ mAh cm}^{-2}$ ) after plating in  $\text{FEC-LiNO}_3$  electrolyte with low magnifications.

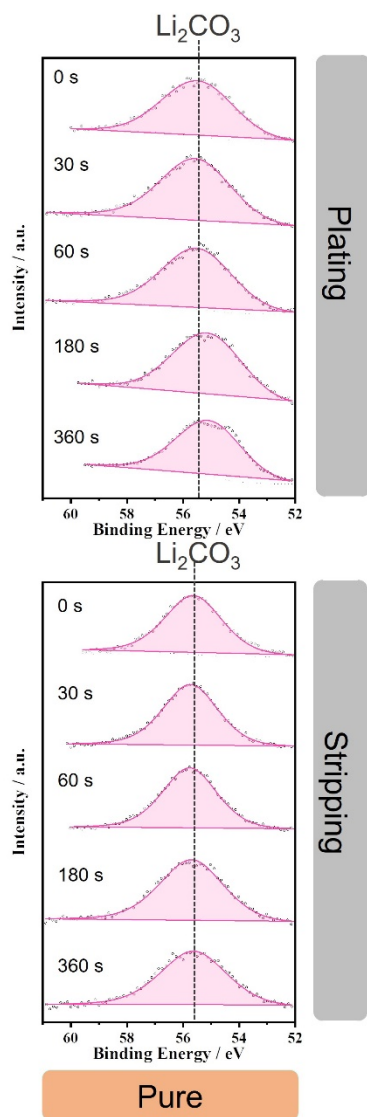

Figure S6. XPS Li 1s depth profiles of the SEIs after Li plating and stripping process in pure electrolyte.

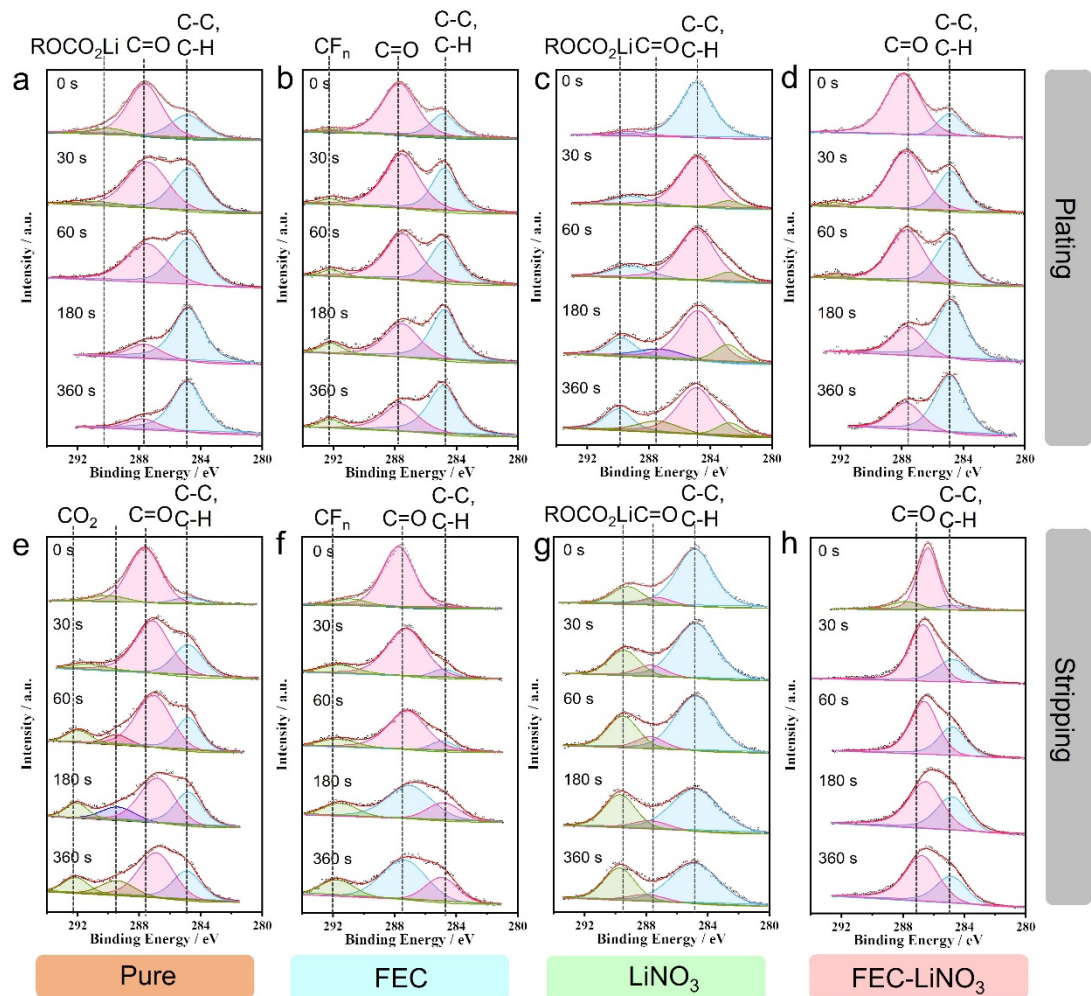

Figure S7. XPS C 1s depth profiles of the SEIs after Li plating and stripping process in pure electrolyte (a, e), FEC electrolyte (b, f), LiNO<sub>3</sub> electrolyte (c, g) and FEC-LiNO<sub>3</sub> electrolyte (d, h) with different depth of SEIs due to Ar<sup>+</sup> sputtering (0s, 30s, 60s, 180s and 360s).

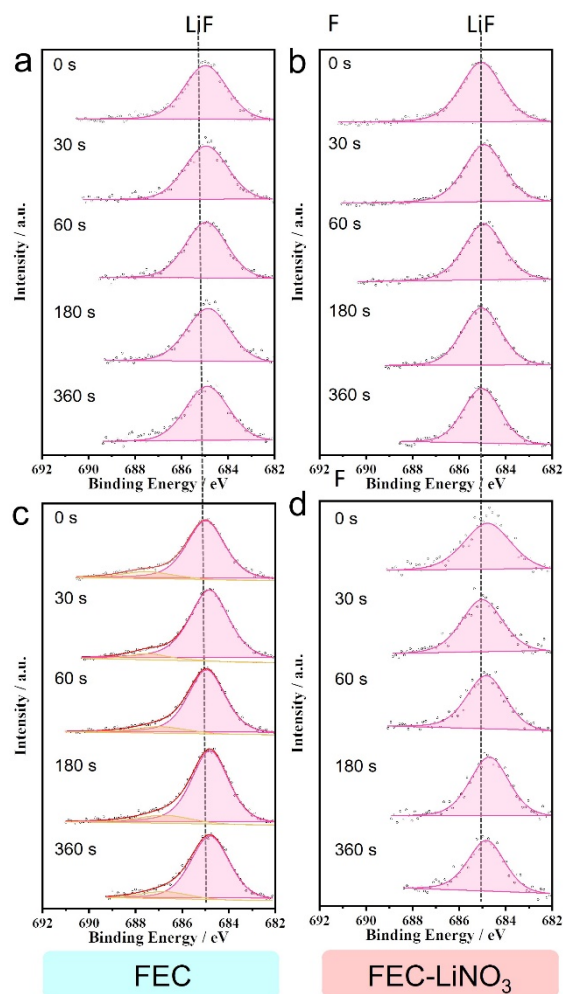

Figure S8. XPS F 1s depth profiles of the SEIs after Li plating and stripping process in FEC electrolyte (a, c) and FEC-LiNO<sub>3</sub> electrolyte (b, d) with different depth of SEIs due to Ar<sup>+</sup> sputtering (0s, 30s, 60s, 180s and 360s).

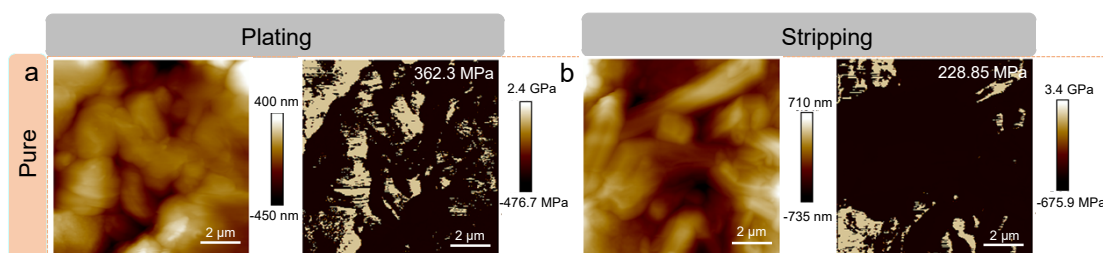

Figure S9. AFM and modulus images of SEI on Li metal after plating at 1.0 mA cm<sup>-2</sup> for 2 h (2.0 mAh cm<sup>-2</sup>) and stripping to 1V in pure electrolyte.



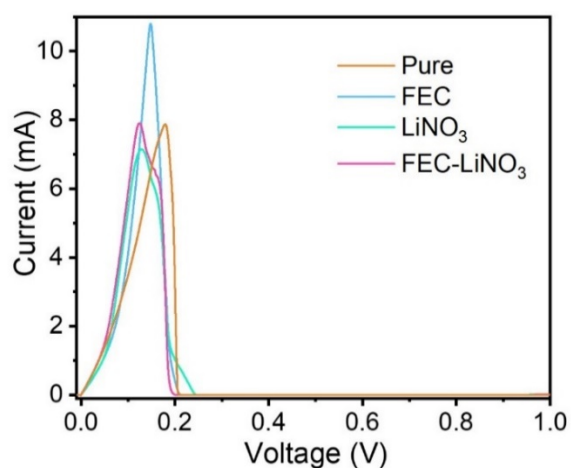

Figure S10. The LSV curve between 0-1.0 V at a scan rate of  $0.1 \text{ mVs}^{-1}$ .

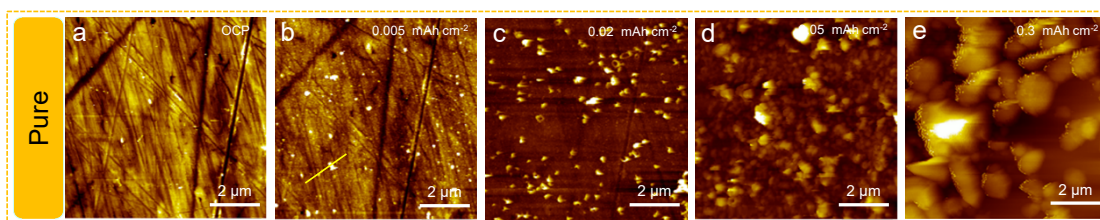

Figure S11. In situ AFM images of Li metal nucleation and growth. Morphology of the Cu foil during galvanostatic discharge at  $1.0 \text{ mA cm}^{-2}$  for 18 s ( $0.005 \text{ mAh cm}^{-2}$ ), 72 s ( $0.02 \text{ mAh cm}^{-2}$ ), 180 s ( $0.05 \text{ mAh cm}^{-2}$ ) and 1080 s ( $0.3 \text{ mAh cm}^{-2}$ ) in pure LiBOB-based electrolyte without any  $\text{LiNO}_3$  or FEC additives.

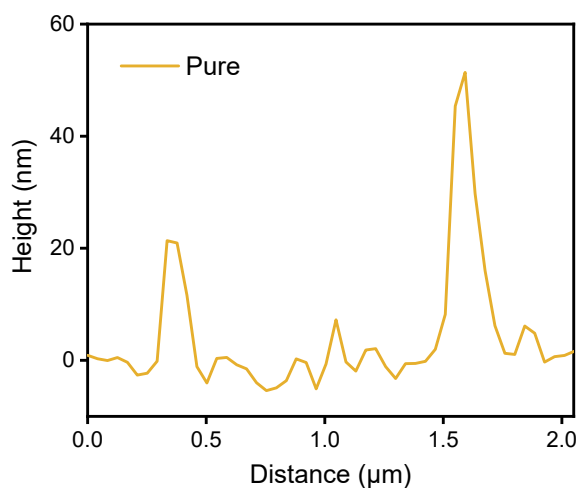

Figure S12. The corresponding height curves in corresponding to the marked regions in Figure S11b in pure LiBOB-based electrolyte without any  $\text{LiNO}_3$  or FEC additives.
